# Supplementary material for: Feasibility of Raman spectroscopic identification of gall bladder cancer using extracellular vesicles extracted from bile
Source: Royal Society of Chemistry journal article supplement (doi:10.1039/d3an00806a), 2023-01-01
Supplement: d3an00806a1.pdf [file d3an00806a1.pdf]

## Supplementary material

### Feasibility study for Raman spectroscopic identification of gall bladder cancer using extracellular vesicles extracted from bile

Thu Thuy Bui<sup>a</sup>, Eunjin Jang<sup>a</sup>, Ji Hyun Shin<sup>b</sup>, Tae Hun Kim<sup>b</sup>, Hayoon Kim<sup>b</sup>, Dongho Choi<sup>b</sup>,  
Tung Duy Vu<sup>c</sup> and Hoeil Chung<sup>a,\*</sup>

<sup>a</sup>*Department of Chemistry and Research Institute for Convergence of Basic Science, Hanyang  
University, Seoul 04763, Republic of Korea*

<sup>b</sup>*Department of Surgery, College of Medicine, Hanyang University, Seoul 04763,  
Republic of Korea*

<sup>c</sup>*Faculty of Chemistry, University of Science, Vietnam National University, Hanoi, Vietnam*

\*Corresponding author

E-mail addresses: hoeil@hanyang.ac.kr (H. Chung),

Table S1. Gender, age, and cancer stage of the patients who provided the bile samples

| Number | Gender | Age | BMI   | Stage  | Number | Gender | Age   | BMI           | Stage                    |  |
|--------|--------|-----|-------|--------|--------|--------|-------|---------------|--------------------------|--|
| 1      | F      | 33  | 22.25 | Normal | 1      | F      | 35    | 19.48         | Hepatocellular<br>Cancer |  |
| 2      | F      | 37  | 22.35 |        | 2      | F      | 54    | 26.17         |                          |  |
| 3      | M      | 22  | 22.72 |        | 3      | F      | 69    | 25.72         |                          |  |
| 4      | M      | 23  | 22.56 |        | 4      | M      | 72    | 17.41         |                          |  |
| 1      | F      | 35  | 17.02 | 5      | M      | 49     | 29.50 | GB Cancer IIA |                          |  |
| 2      | F      | 41  | 22.03 | 6      | F      | 51     | 28.44 |               |                          |  |
| 3      | F      | 41  | 23.02 | 7      | F      | 60     | 23.34 |               |                          |  |
| 4      | F      | 50  | 22.01 | 8      | M      | 69     | 23.1  |               |                          |  |
| 5      | F      | 56  | 24.30 | 1      | F      | 69     | 24.49 |               |                          |  |
| 6      | F      | 60  | 22.01 | 2      | F      | 73     | 28.16 | GB Cancer I   |                          |  |
| 7      | M      | 63  | 23.61 | 3      | F      | 79     | 24.96 | GB Cancer IIA |                          |  |
| 8      | F      | 71  | 21.97 | 4      | M      | 34     | 24.15 | GB Cancer I   |                          |  |
| 9      | F      | 77  | 27.00 | 5      | M      | 80     | 21.01 | GB Cancer IIA |                          |  |
| 10     | M      | 17  | 35.04 | Polyp  |        |        |       |               |                          |  |
| 11     | M      | 29  | 22.71 |        |        |        |       |               |                          |  |
| 12     | M      | 33  | 24.73 |        |        |        |       |               |                          |  |
| 13     | M      | 37  | 29.87 |        |        |        |       |               |                          |  |
| 14     | M      | 39  | 24.99 |        |        |        |       |               |                          |  |
| 15     | M      | 58  | 24.54 |        |        |        |       |               |                          |  |
| 16     | M      | 62  | 24.38 |        |        |        |       |               |                          |  |
| 17     | M      | 68  | 22.02 |        |        |        |       |               |                          |  |
| 18     | M      | 70  | 24.39 |        |        |        |       |               |                          |  |
| 19     | M      | 36  | 23.88 |        |        |        |       |               |                          |  |
| 20     | M      | 44  | 23.94 |        |        |        |       |               |                          |  |
| 21     | M      | 65  | 35.11 |        |        |        |       |               |                          |  |

Gallbladder stage (0, I, IA, IIA, IIB, IIIA, IIIB, IVA, IVB)

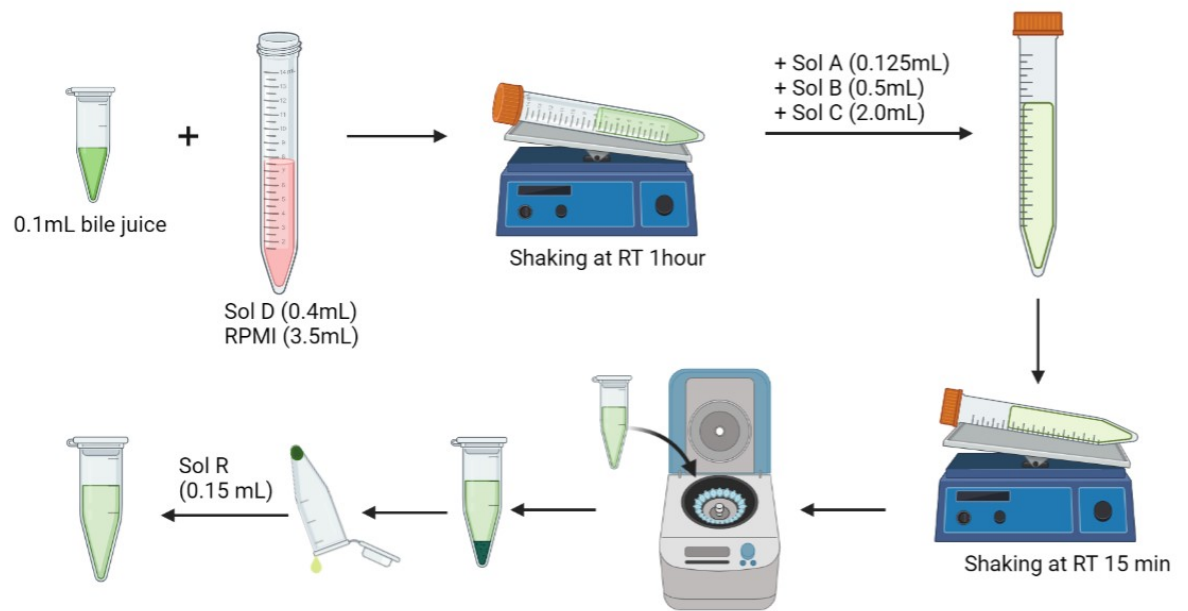

Figure S1: The procedure of EVs extraction from bile juice samples.

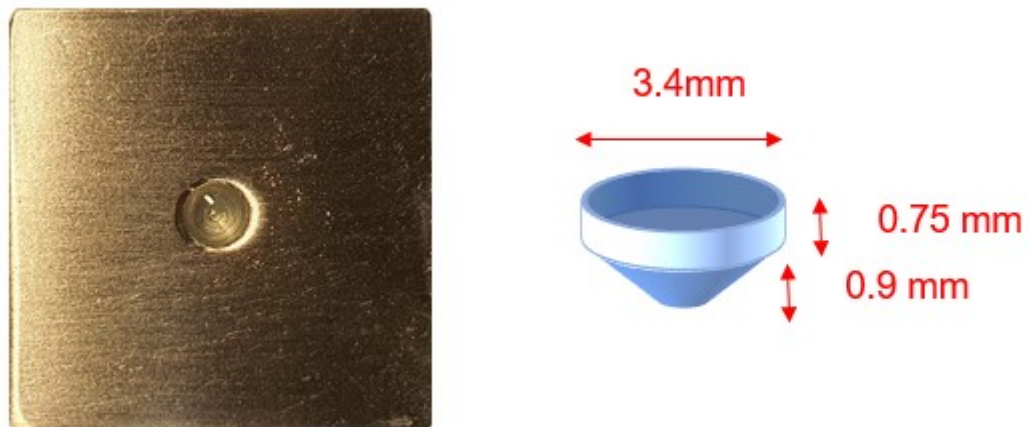

Figure S2: The picture of metal groove and dimensions of the groove.

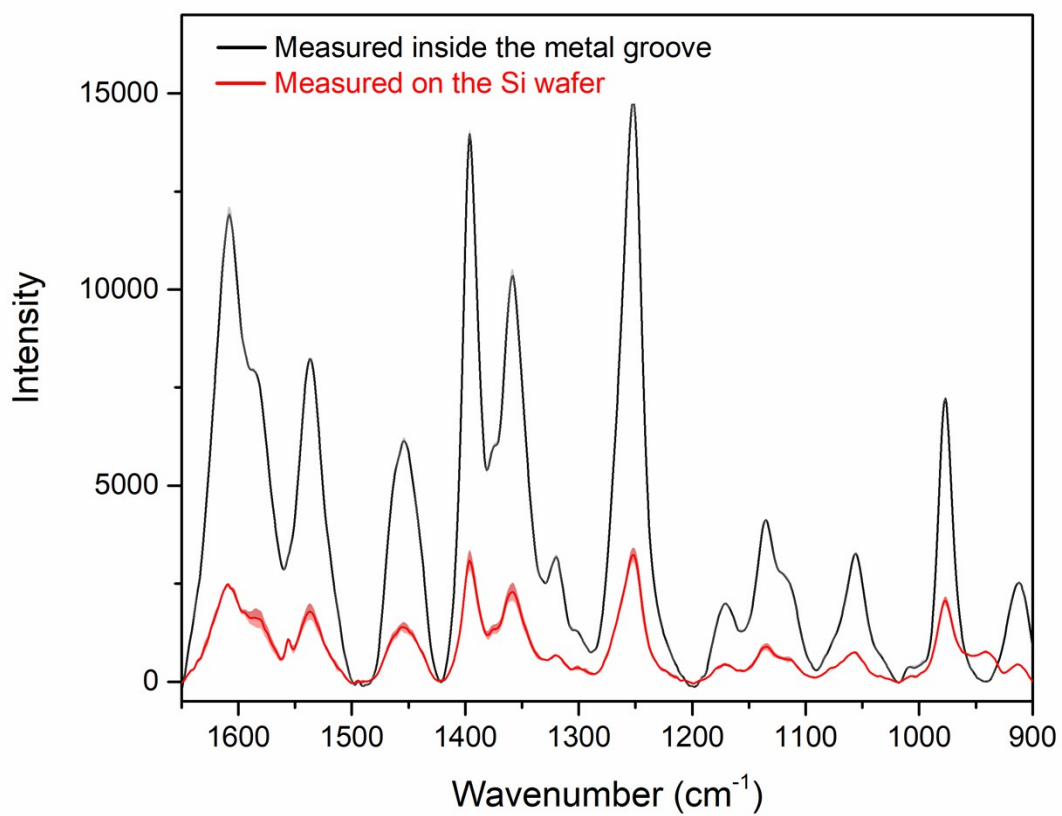

Figure S3. Raman spectra of one bile sample from GB polyp group measured by dropping the EV sample on a Si wafer (red) and into the metal groove (black).

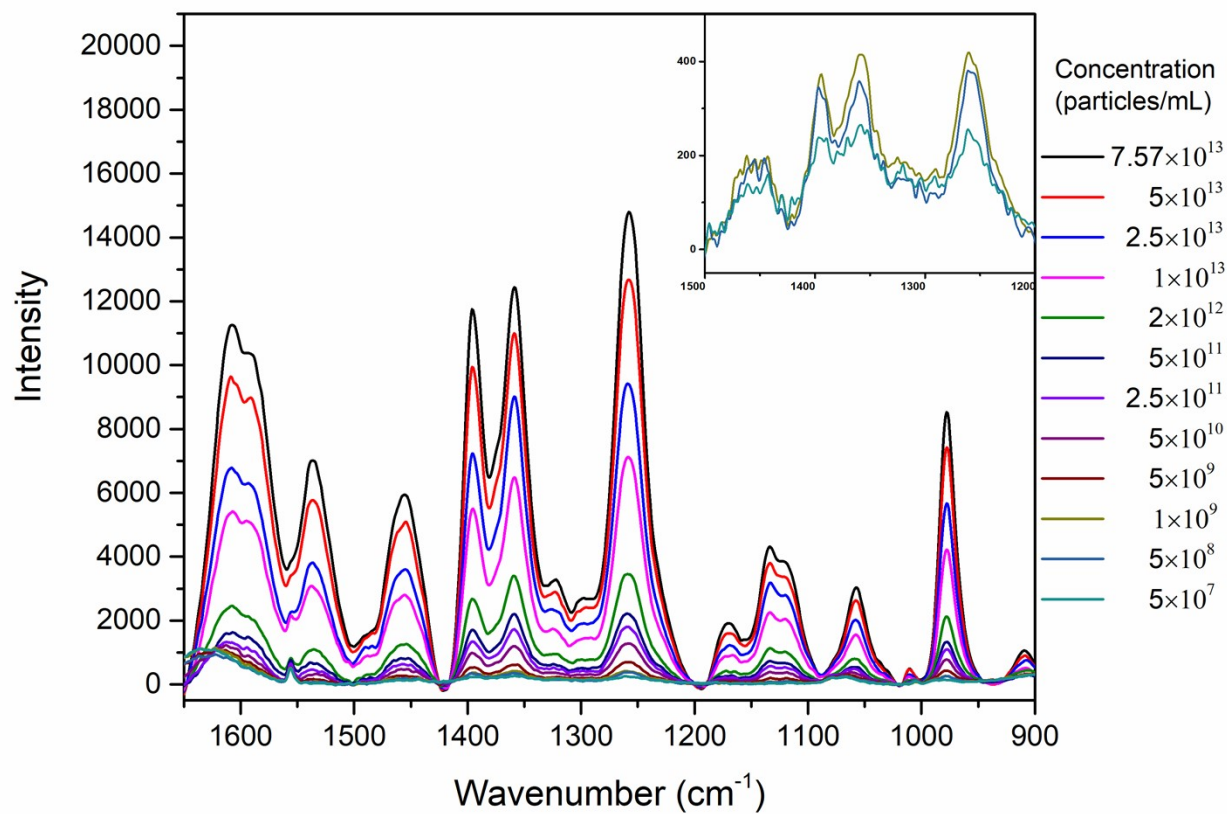

Figure S4: Raman spectra of continuously diluted EV samples extracted from one bile sample from HCC group. The inset highlights the spectra with three lowest EV concentrations.
